# Supplementary material for: The Rare, the Best: Spread of Antimalarial-Resistant Plasmodium falciparum Parasites by Anopheles Mosquito Vectors
Source: PubMed Central journal article supplement (PMC8528099; doi:10.1128/spectrum.00852-21), 2021-10-20
Supplement: spectrum00852-21_supp_1_seq9.pdf [file spectrum00852-21_supp_1_seq9.pdf]

1 SUPPLEMENTARY DATA

2 Appendix Table S1: Global data concerning the gametocyte, oocyst, and sporozoite samples

| Gametocyte Carrier | Blood samples (Gametocytes) |                  |                          |            | Gut samples (Oocysts) |                   |                         | Salivary gland samples (Sporozoites) |                   |                 |                               |            |
|--------------------|-----------------------------|------------------|--------------------------|------------|-----------------------|-------------------|-------------------------|--------------------------------------|-------------------|-----------------|-------------------------------|------------|
|                    | Gametocyte density*         | MOI <sup>†</sup> | % <i>pfcr</i> 76 alleles |            | N <sup>‡</sup>        | Mean <sup>§</sup> | Prevalence <sup>¶</sup> | N <sup>#</sup>                       | MOI <sup>  </sup> | N <sup>**</sup> | Mean % <i>pfcr</i> 76 alleles |            |
|                    |                             |                  | <i>K76</i>               | <i>76T</i> |                       |                   |                         |                                      |                   |                 | <i>K76</i>                    | <i>76T</i> |
| <b>gc1</b>         | 23                          | NA               | 31.3                     | 68.7       | 30                    | 0.2               | 13.3                    | NA                                   | NA                | 16              | 51.0                          | 49.0       |
| <b>gc3</b>         | 88                          | NA               | 0.0                      | 100.0      | 45                    | 3.8               | 42.2                    | NA                                   | NA                | 11              | 41.7                          | 58.3       |
| <b>gc4</b>         | 11                          | NA               | 0.0                      | 100.0      | 28                    | 0.0               | 0.0                     | NA                                   | NA                | 3               | 56.3                          | 43.7       |
| <b>gc6</b>         | 24                          | NA               | 100.0                    | 0.0        | 23                    | 0.5               | 21.7                    | NA                                   | NA                | 24              | 57.7                          | 42.3       |
| <b>gc7</b>         | 901                         | 2                | 0.0                      | 100.0      | 45                    | 40.3              | 48.9                    | 9                                    | 2                 | 24              | 45.2                          | 54.8       |
| <b>gc8</b>         | 17                          | NA               | 32.1                     | 67.9       | 60                    | 4.2               | 51.7                    | NA                                   | NA                | 16              | 30.8                          | 69.2       |
| <b>gc9</b>         | 107                         | NA               | 21.1                     | 78.9       | 48                    | 2.0               | 29.2                    | NA                                   | NA                | 17              | 28.9                          | 71.1       |
| <b>gc10</b>        | 177                         | NA               | 0.0                      | 100.0      | 29                    | 17.5              | 69.0                    | NA                                   | NA                | 12              | 13.6                          | 86.4       |
| <b>gc11</b>        | 33                          | NA               | 49.5                     | 50.5       | 50                    | 3.4               | 40.0                    | NA                                   | NA                | 4               | 49.6                          | 50.4       |
| <b>gc12</b>        | 18                          | NA               | 0.0                      | 100.0      | 46                    | 0.9               | 21.7                    | NA                                   | NA                | 5               | 14.9                          | 85.1       |
| <b>gc13</b>        | 31                          | 3                | 0.0                      | 100.0      | 39                    | 6.0               | 51.3                    | 4                                    | 3                 | 23              | 29.5                          | 70.5       |
| <b>gc14</b>        | 16                          | 3                | 32.1                     | 67.9       | 47                    | 1.9               | 34.0                    | 3                                    | 3                 | 15              | 27.1                          | 72.9       |
| <b>gc16</b>        | 91                          | NA               | 58.7                     | 41.3       | 19                    | 2.1               | 42.1                    | NA                                   | NA                | 17              | 43.9                          | 56.1       |
| <b>gc17</b>        | 154                         | 3                | 0.0                      | 100.0      | 37                    | 2.5               | 10.8                    | 3                                    | 3                 | 15              | 0.0                           | 100.0      |
| <b>gc19</b>        | 95                          | NA               | 0.0                      | 100.0      | 31                    | 74.9              | 87.1                    | NA                                   | NA                | 12              | 24.7                          | 75.3       |
| <b>gc20</b>        | 83                          | NA               | 76.3                     | 23.7       | 49                    | 45.9              | 65.3                    | NA                                   | NA                | 19              | 55.8                          | 44.2       |
| <b>gc21</b>        | 20                          | NA               | 21.3                     | 78.9       | 79                    | 2.3               | 60.8                    | NA                                   | NA                | 11              | 16.8                          | 83.2       |
| <b>gc22</b>        | 23                          | NA               | 47.3                     | 52.7       | 36                    | 3.1               | 61.1                    | NA                                   | NA                | 17              | 47.6                          | 52.4       |
| <b>gc24</b>        | 23                          | 4                | 34.1                     | 65.9       | 32                    | 3.4               | 68.8                    | 7                                    | 4                 | 18              | 47.3                          | 52.7       |

|             |      |    |       |       |    |       |      |    |    |    |      |       |
|-------------|------|----|-------|-------|----|-------|------|----|----|----|------|-------|
| <b>gc25</b> | 154  | 1  | 0.0   | 100.0 | 26 | 43.6  | 80.8 | 3  | 3  | 8  | 10.1 | 89.9  |
| <b>gc26</b> | 2304 | 1  | 0.0   | 100.0 | 38 | 185.1 | 81.5 | 6  | 2  | 3  | 28.9 | 71.1  |
| <b>gc27</b> | 11   | NA | 0.0   | 100.0 | 24 | 0.0   | 0.0  | NA | NA | 10 | 38.9 | 61.1  |
| <b>gc28</b> | 21   | NA | 0.0   | 100.0 | 25 | 5.5   | 56.0 | NA | NA | 6  | 21.6 | 78.4  |
| <b>gc35</b> | 36   | 5  | 34.9  | 65.1  | 47 | 6.2   | 85.1 | 6  | 5  | 4  | 45.4 | 54.6  |
| <b>gc36</b> | 18   | NA | 74.4  | 25.6  | 45 | 5.8   | 91.1 | NA | NA | 3  | 7.2  | 92.8  |
| <b>gc41</b> | 144  | NA | 22.2  | 77.8  | 46 | 5.3   | 56.5 | NA | NA | 5  | 31.2 | 68.8  |
| <b>gc47</b> | 245  | 2  | 74.7  | 25.3  | 41 | 6.3   | 58.5 | 11 | 5  | 10 | 97.1 | 2.9   |
| <b>gc48</b> | 49   | 2  | 0.0   | 100.0 | 32 | 2.3   | 75.0 | 19 | 5  | 7  | 0.0  | 100.0 |
| <b>gc49</b> | 524  | 5  | 20.4  | 79.6  | 48 | 15.7  | 80.9 | 5  | 3  | 5  | 14.0 | 86.0  |
| <b>gc50</b> | 21   | 4  | 65.9  | 34.1  | 74 | 3.5   | 70.3 | 34 | 6  | 10 | 18.3 | 81.7  |
| <b>gc52</b> | 55   | 3  | NA    | NA    | 43 | 1.4   | 53.5 | 5  | 3  | NA | NA   | NA    |
| <b>gc53</b> | 64   | 5  | NA    | NA    | 21 | 7.1   | 76.2 | 3  | 4  | NA | NA   | NA    |
| <b>gc56</b> | 173  | 3  | 75.5  | 24.5  | 65 | 13.9  | 81.5 | 15 | 4  | 5  | 91.8 | 8.2   |
| <b>gc60</b> | 46   | 2  | 100.0 | 0.0   | 50 | 4.0   | 84.0 | 15 | 5  | 10 | 84.4 | 15.6  |
| <b>gc63</b> | 57   | 5  | 75.6  | 24.4  | 54 | 8.3   | 90.7 | 10 | 4  | 9  | 78.6 | 21.4  |
| <b>gc64</b> | 647  | 1  | 100.0 | 0.0   | 23 | 53.7  | 78.3 | 12 | 3  | 10 | 96.1 | 3.9   |
| <b>gc66</b> | 296  | 1  | 0.0   | 100.0 | 51 | 36.4  | 84.3 | 15 | 4  | 17 | 1.4  | 98.6  |
| <b>gc67</b> | 165  | 6  | 31.8  | 68.2  | 33 | 20.2  | 93.9 | 12 | 7  | 9  | 38.0 | 62.0  |
| <b>gc68</b> | 56   | 2  | 29.2  | 70.8  | 28 | 9.6   | 82.1 | 16 | 5  | 10 | 34.3 | 65.7  |
| <b>gc69</b> | 103  | 2  | 59.0  | 41.0  | 38 | 1.8   | 52.6 | 30 | 8  | 13 | 48.7 | 59.3  |
| <b>gc70</b> | 48   | 3  | 100.0 | 0.0   | 46 | 1.2   | 52.2 | 19 | 7  | 8  | 63.9 | 36.1  |
| <b>gc71</b> | 62   | 1  | 0.0   | 100.0 | 49 | 3.0   | 71.4 | 3  | 1  | 4  | 0.0  | 100.0 |
| <b>gc72</b> | 33   | 2  | 0.0   | 100.0 | 35 | 2.3   | 48.6 | 13 | 3  | 8  | 87.5 | 12.5  |
| <b>gc76</b> | 266  | 2  | 56.5  | 43.5  | 50 | 14.4  | 84.0 | 28 | 4  | 11 | 67.0 | 33.0  |
| <b>gc78</b> | 23   | 4  | 66.1  | 33.9  | 50 | 5.9   | 90.0 | 10 | 4  | 9  | 56.5 | 43.5  |
| <b>gc79</b> | 32   | 2  | 0.0   | 100.0 | 23 | 5.1   | 91.3 | 9  | 3  | 9  | 32.0 | 68.0  |
| <b>gc80</b> | 33   | 7  | 50.4  | 40.6  | 45 | 10.5  | 93.3 | 8  | 3  | 18 | 0.0  | 100.0 |

|              |     |    |       |       |    |      |      |    |   |    |       |       |
|--------------|-----|----|-------|-------|----|------|------|----|---|----|-------|-------|
| <b>gc81</b>  | 19  | 6  | 72.0  | 28.0  | 40 | 1.8  | 60.0 | 14 | 7 | 10 | 34.0  | 66.0  |
| <b>gc83</b>  | 370 | 6  | 56.5  | 43.5  | 54 | 26.0 | 88.9 | 6  | 6 | 6  | 56.8  | 43.2  |
| <b>gc85</b>  | 107 | 3  | 68.3  | 31.7  | 30 | 21.2 | 83.3 | 12 | 4 | 10 | 62.8  | 37.2  |
| <b>gc86</b>  | 53  | 5  | 35.2  | 64.8  | 69 | 23.9 | 95.7 | 12 | 5 | 12 | 29.9  | 70.1  |
| <b>gc88</b>  | 44  | 6  | 28.7  | 71.3  | 38 | 3.0  | 79.0 | 12 | 6 | 19 | 49.6  | 50.4  |
| <b>gc89</b>  | 29  | 4  | 40.2  | 59.8  | 34 | 2.8  | 73.5 | 7  | 3 | 7  | 7.4   | 92.6  |
| <b>gc90</b>  | 68  | 1  | 0.0   | 100.0 | 64 | 3.2  | 81.3 | 12 | 2 | 14 | 0.0   | 100.0 |
| <b>gc93</b>  | 257 | 1  | 100.0 | 0.0   | 27 | 44.6 | 96.3 | 10 | 1 | 6  | 75.0  | 25.0  |
| <b>gc95</b>  | 23  | 6  | 37.0  | 63.0  | 57 | 3.0  | 75.4 | 12 | 6 | 10 | 9.9   | 90.1  |
| <b>gc96</b>  | 98  | 6  | 29.0  | 71.0  | 70 | 8.8  | 78.6 | 12 | 3 | 11 | 0.0   | 100.0 |
| <b>gc97</b>  | 13  | 10 | 75.7  | 24.3  | 47 | 0.4  | 31.9 | 12 | 6 | 10 | 7.0   | 93.0  |
| <b>gc99</b>  | 48  | 5  | 86.2  | 13.8  | 24 | 1.1  | 45.8 | 12 | 3 | 18 | 88.0  | 12.0  |
| <b>gc102</b> | 39  | 4  | 0.0   | 100.0 | 58 | 0.6  | 36.2 | 12 | 4 | 10 | 77.0  | 23.0  |
| <b>gc105</b> | 219 | 2  | 100.0 | 0.0   | 44 | 55.9 | 88.6 | 12 | 2 | 15 | 100.0 | 0.0   |
| <b>gc106</b> | 257 | 2  | 100.0 | 0.0   | 36 | 35.4 | 94.4 | 12 | 1 | 16 | 100.0 | 0.0   |
| <b>gc108</b> | 122 | 5  | 0.0   | 100.0 | 40 | 2.5  | 67.5 | 12 | 5 | 20 | 81.5  | 18.5  |
| <b>gc111</b> | 74  | 1  | NA    | NA    | 36 | 5.4  | 83.3 | 10 | 2 | NA | NA    | NA    |
| <b>gc112</b> | 47  | 7  | 100.0 | 0.0   | 41 | 8.5  | 85.4 | 12 | 6 | 9  | 100.0 | 0.0   |
| <b>gc113</b> | 40  | 1  | 0.0   | 100.0 | 48 | 2.2  | 77.1 | 12 | 2 | 10 | 96.1  | 3.9   |
| <b>gc115</b> | 49  | 3  | 0.0   | 100.0 | 44 | 3.6  | 70.5 | 12 | 4 | 10 | 3.0   | 97.0  |

3

4 NA: not available

5 \* Gametocyte density was expressed as the number of gametocytes per microliter

6 † Multiplicity of the infection (MOI) in the gametocyte population

7 ‡ Number of gut samples analyzed for oocyst content and prevalence of infection

8 § Mean number of oocysts per gut sample

- 9 ¶ Prevalence of infected mosquitoes
- 10 # Number of salivary gland samples analysed for microsatellite profile
- 11 || Multiplicity of the infection (MOI) in sporozoite population
- 12 \*\*Number of salivary gland samples analysed for *pfcr* 76 genotyping

13 **Appendix Figure S1: Quantification of mutant and wild-type *pfcr* 76 alleles using FRET-**  
14 **based DNA hybridization probes.** DNA from the FcM29/Cameroon clone carrying mutant  
15 *pfcr* 76T allele was used as mutant control, whereas DNA from the F32/Tanzania strain  
16 carrying wild-type *pfcr* K76 allele was used as wild-type control. We produced standards with  
17 a known proportion of mutant and wild-type *pfcr* 76 alleles to quantify the proportion of *pfcr*  
18 76 alleles through the real-time PCR method and validate the reproducibility of the  
19 quantification method. Numbers 1–3 represent a F32/Tanzania: FcM29/Cameroon ratio of  
20 7.5:2.5, 5:5, and 2.5:7.5, respectively. The figure shows the negative first derivative of  
21 fluorescence with respect to the temperature (-dF/dT) plotted against the temperature for the  
22 different mixtures of mutant and wild-type *pfcr* 76 alleles. The two melting peaks of the mutant  
23 (*pfcr* 76T) and the wild-type (*pfcr* K76) alleles are clearly separated by ~5°C. In the mixtures  
24 of wild-type and mutant alleles, two peaks are obtained according to the proportion of each  
25 allele. The relative quantification of mutant or wild-type alleles was determined by calculating  
26 the ratio of melting peak heights of the high (mutant) or low (wild-type) temperature melting  
27 curves against the sum of heights of both mutant and wild-type melting peaks, respectively (22,  
28 23):

$$29 \text{ Mutant \%} = \frac{\text{Mutant Tm peak height}}{\text{Mutant Tm peak height} + \text{wild-type Tm peak height}} \times 100$$

$$30 \text{ Wild-type \%} = \frac{\text{Wild-type Tm peak height}}{\text{Mutant Tm peak height} + \text{wild-type Tm peak height}} \times 100$$

31 These mixed samples (1-3) tested in duplicate showed the good reproducibility of the  
32 quantification method.

33

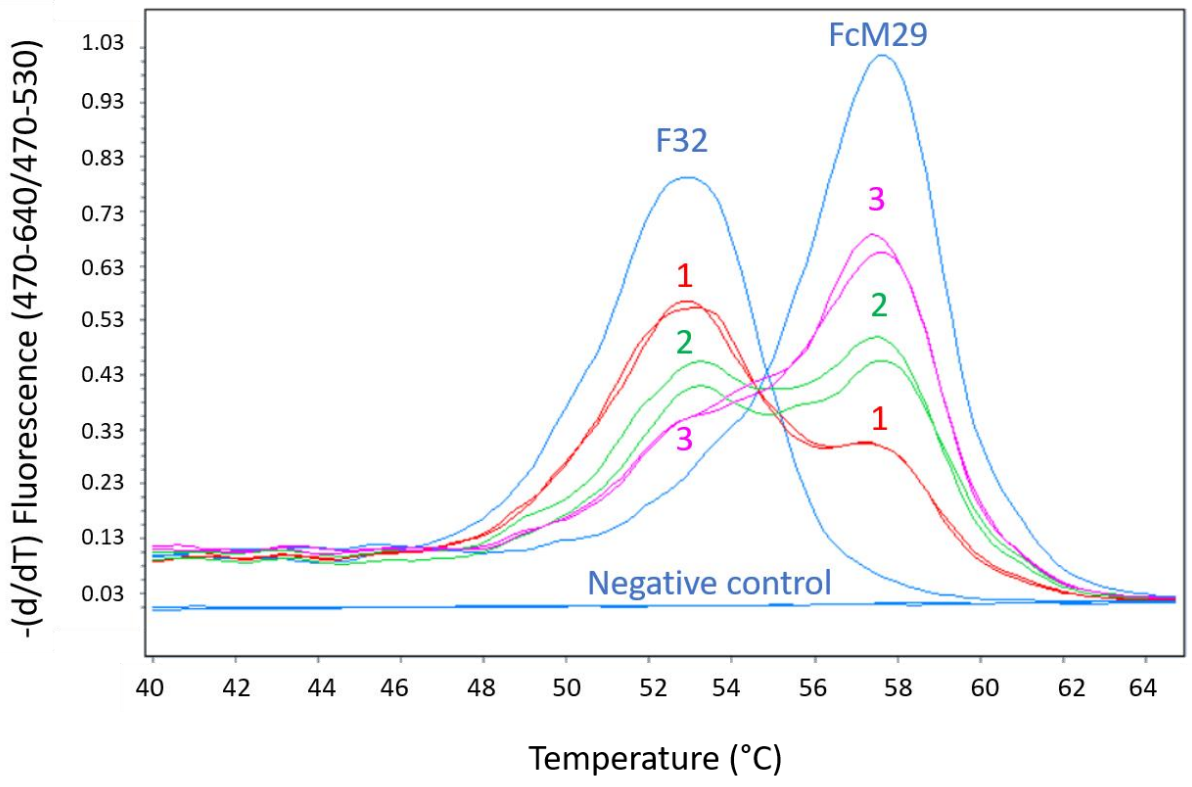

34

35 **Appendix Figure S2: Validation of the method for the quantification of the proportion**  
36 **of mutant *pfcr* 76T and wild-type *pfcr* K76 alleles.**

37 The relative amount of mutant and wild-type *pfcr* 76 alleles was calculated for each sample as  
38 described in the material and method section and plotted against the theoretical amount of  
39 mutant and wild-type alleles present in the pre-mixed standards. A standard curve was plotted  
40 using the pre-mixed DNA standards in the 0–100% range and the calculated proportion of wild-  
41 type (A) or mutant (B) alleles present in samples. Linear regressions provided good fitting  
42 curves ( $R^2 = 0.9831$  and  $R^2 = 0.9834$  for the wild-type allele and for the mutant allele,  
43 respectively), validating the method for the accurate quantification of the mutant and wild-type  
44 *pfcr* 76 alleles in biological samples.

45 (A)

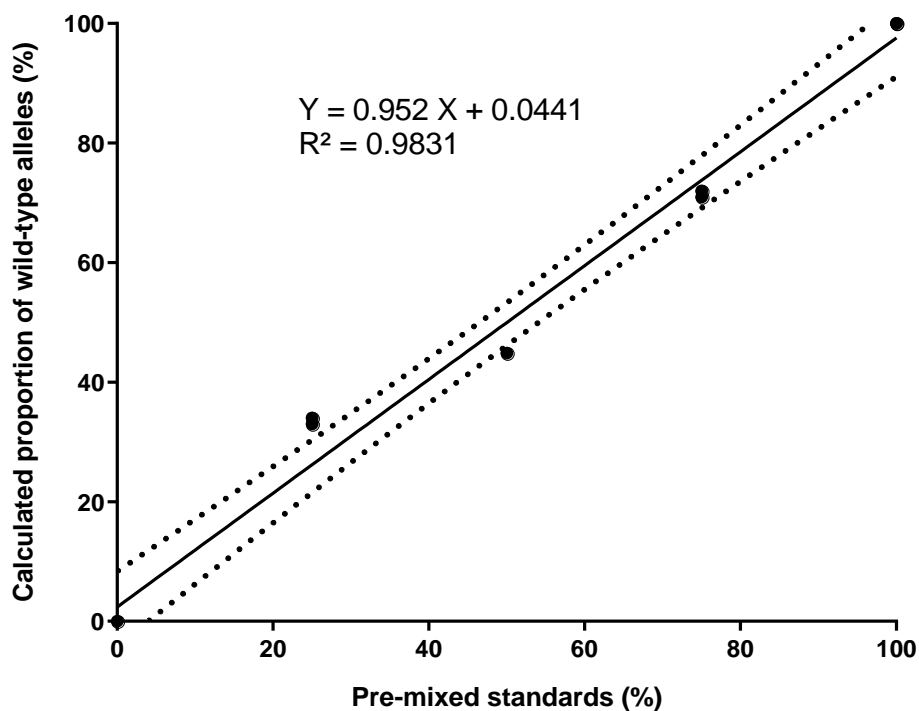

46

47

48 (B)

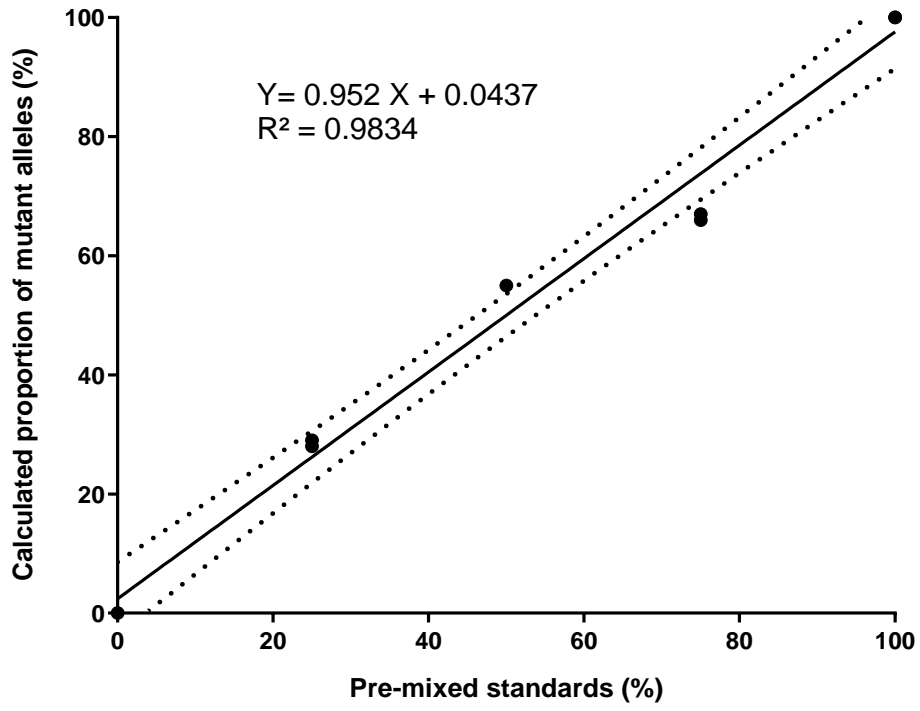

49



50 **Appendix Figure S3: Box plot of wild-type *pfcr76* alleles in gametocyte and sporozoite**  
51 **samples.** The dots represent the observed proportion of wild-type *pfcr76* alleles in the  
52 gametocyte samples and the observed average proportion of wild-type *pfcr76* alleles in the  
53 sporozoite samples. Box plots represent the median, 25<sup>th</sup> and 75<sup>th</sup> percentiles, and the minimum  
54 and the maximum.

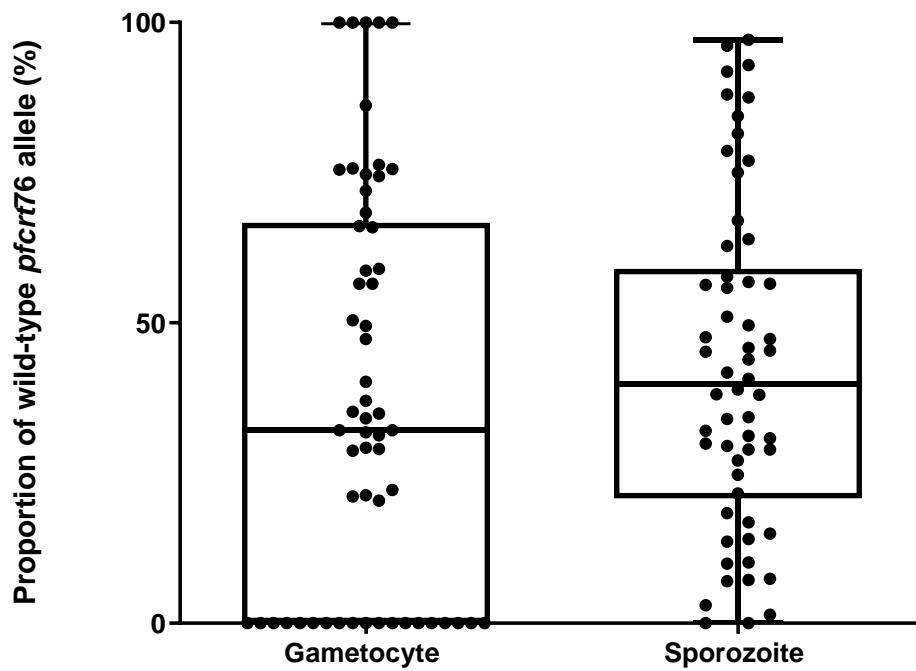

55

56

57 **Appendix Figure S4: Dispersion of the proportion of wild-type *pfcr* 76 alleles in**  
58 **gametocyte samples and in paired sporozoite samples.** The dots represent the observed  
59 proportion of wild-type *pfcr* 76 alleles in each sporozoite sample against the observed  
60 proportion of wild-type *pfcr* 76 alleles in the paired gametocyte sample. The blue line  
61 represents the expected and theoretical distribution of dots if the vector has no influence in the  
62 transmission of *pfcr* 76 alleles. The dot size is weighted by the number of samples

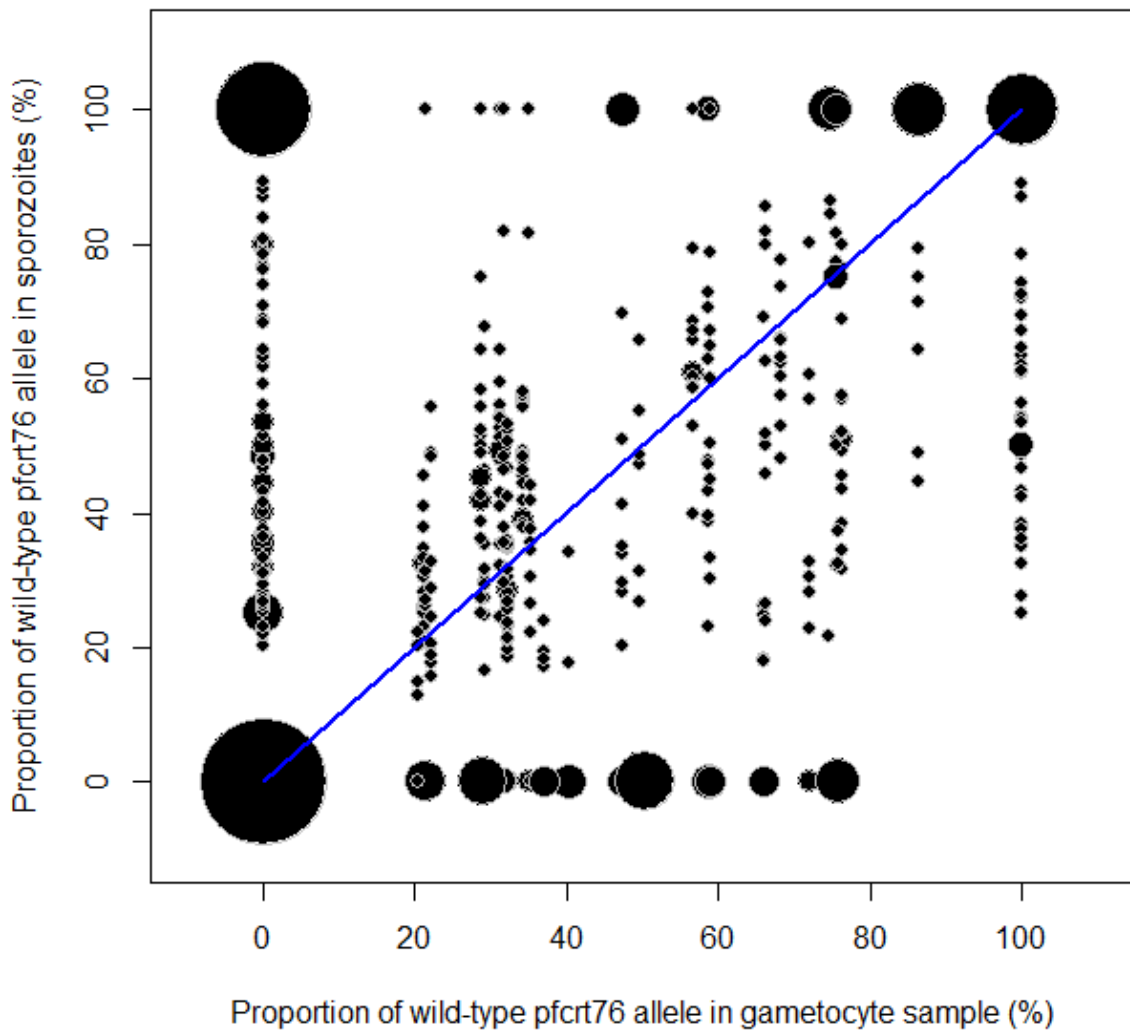

63

64 **Appendix Figure S5: Logistic regression of the probability of a higher proportion of wild-**  
65 **type *pfcr76* alleles in sporozoite samples as a function of the proportion of wild-type *pfcr76***  
66 **alleles in gametocyte samples.** The proportion of wild-type *pfcr76* alleles in sporozoite  
67 samples was compared to that in the paired gametocyte samples. The probability of having a  
68 higher proportion of wild-type *pfcr76* alleles in sporozoite samples was calculated for each  
69 gametocyte sample using a logistic regression; the donor effect was taken into account. This  
70 probability (expressed in percentage) as a function of the proportion of wild-type *pfcr76* alleles  
71 in gametocyte samples was plotted (red line). The blue line represents the expected probability  
72 if the variation of the proportion of wild-type *pfcr76* alleles in sporozoite samples is randomly  
73 distributed (50% of a higher proportion and 50% of a lower proportion).

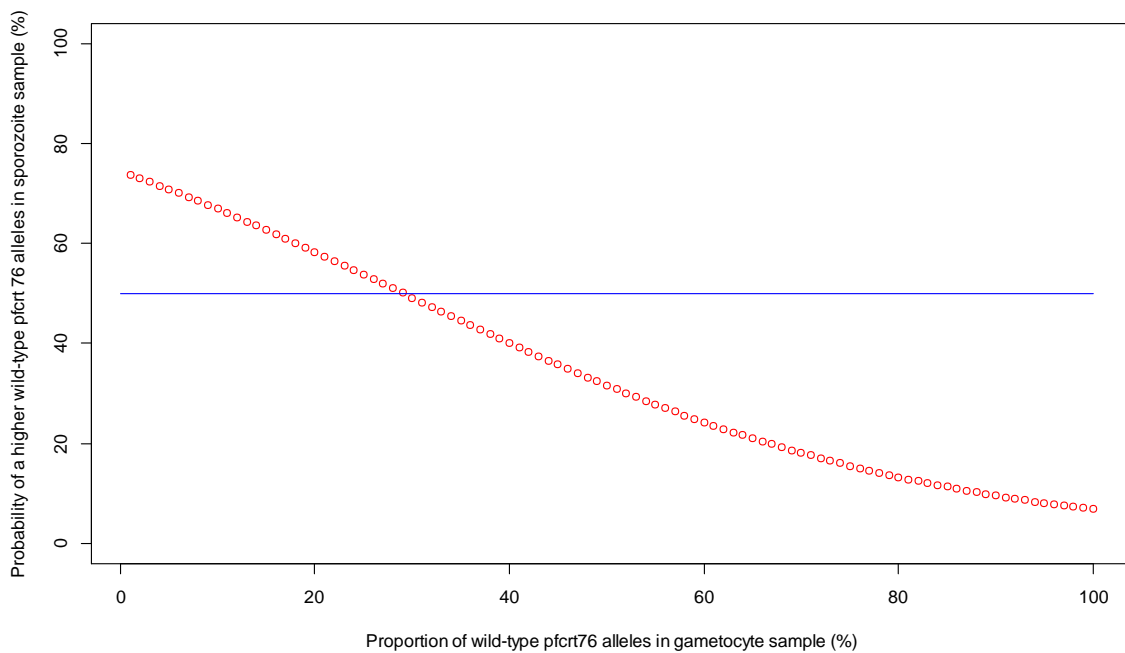

74

75 **Appendix Figure S6: Distribution of the increase in the frequency of parasites with wild-**  
76 **type *pfcr* 76 alleles between the gametocyte and sporozoite stages for experimental**  
77 **infections where the proportion of parasites harboring the considered allele does not**  
78 **exceed 20% at the gametocyte stage.** Dashed line represents the average of this increase.

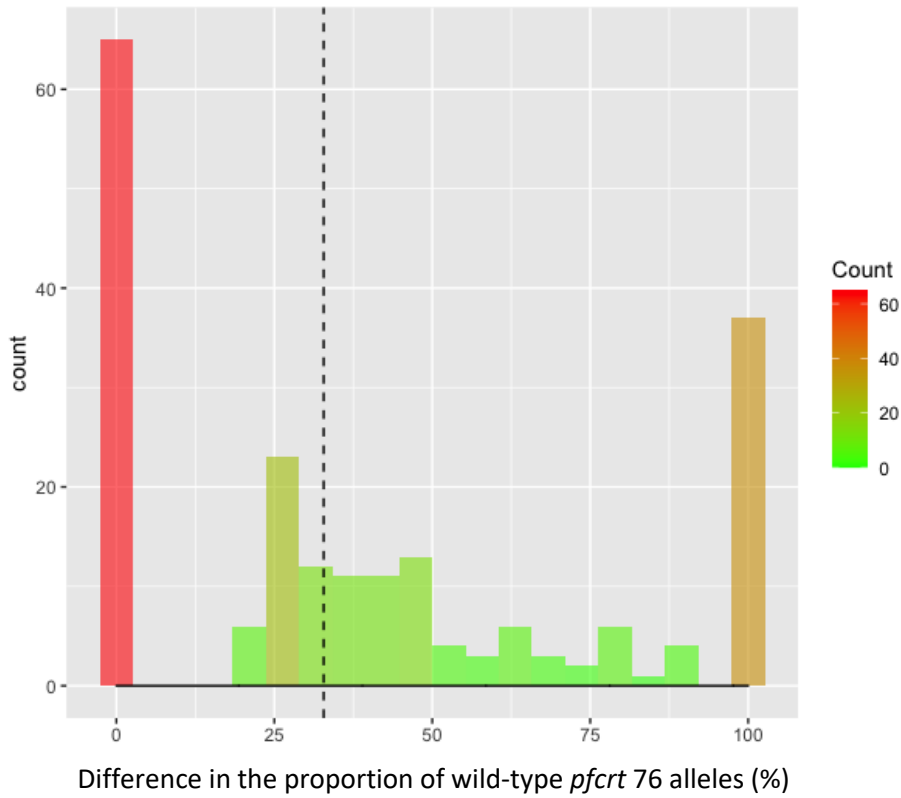

79
